# Supplementary material
Source: PubMed Central journal article supplement (PMC4663173)

Supplemental Table 1.

|                    | Interferon- $\gamma$ |       |            |       |           |       |        |       | Interleukin-4 |       |            |       |           |       |        |       |
|--------------------|----------------------|-------|------------|-------|-----------|-------|--------|-------|---------------|-------|------------|-------|-----------|-------|--------|-------|
|                    | Menstrual            |       | Follicular |       | Ovulatory |       | Luteal |       | Menstrual     |       | Follicular |       | Ovulatory |       | Luteal |       |
|                    | Mean <sup>a</sup>    | SD    | Mean       | SD    | Mean      | SD    | Mean   | SD    | Mean          | SD    | Mean       | SD    | Mean      | SD    | Mean   | SD    |
| Sexually Active    | 10.76                | 13.39 | 13.77      | 17.59 | 19.30     | 27.42 | 12.30  | 13.75 | 7.28          | 21.45 | 5.44       | 14.20 | 6.53      | 10.82 | 7.82   | 14.37 |
| Sexually Abstinent | 10.12                | 11.43 | 35.67      | 98.02 | 9.87      | 11.06 | 13.52  | 21.17 | 4.54          | 11.45 | 14.37      | 44.50 | 8.13      | 17.33 | 3.94   | 7.17  |

<sup>a</sup> All cytokine values expressed in pg/mL

Supplemental Table 2.

Repeated measures moderated mediation (corresponding to Supplemental Figure 2a)

|                                                                                        | <u>Effect estimate</u> | <u>Standard error</u> |
|----------------------------------------------------------------------------------------|------------------------|-----------------------|
| Direct effect of X on Y                                                                | -0.13                  | 0.19                  |
| Effect of X on M                                                                       | 0.10                   | 5.93                  |
| Effect of W on M                                                                       | -20.28                 | 24.51                 |
| Effect of XW on M                                                                      | 19.05                  | 9.33                  |
| Effect of M on Y                                                                       | 0.01                   | 0.00                  |
| Conditional effect of X on Y through M at level<br>1 of moderator (Sexually active)    | 0.17                   | 0.16                  |
| Conditional effect of X on Y through M at level<br>2 of moderator (Sexually abstinent) | 0.00                   | 0.06                  |
| Index of moderated mediation                                                           | 0.17                   | 0.17                  |

Luteal-phase only mediation model (corresponding to Supplemental Figure 2b)

|                                     | <u>Effect estimate</u> | <u>Standard error</u> |
|-------------------------------------|------------------------|-----------------------|
| Direct effect of X on Y             | -0.06                  | 1.90                  |
| Effect of X on M                    | 115.78                 | 38.00                 |
| Effect of M on Y                    | 0.01                   | 0.01                  |
| Indirect effect of X on Y through M | 1.66                   | 11.67                 |

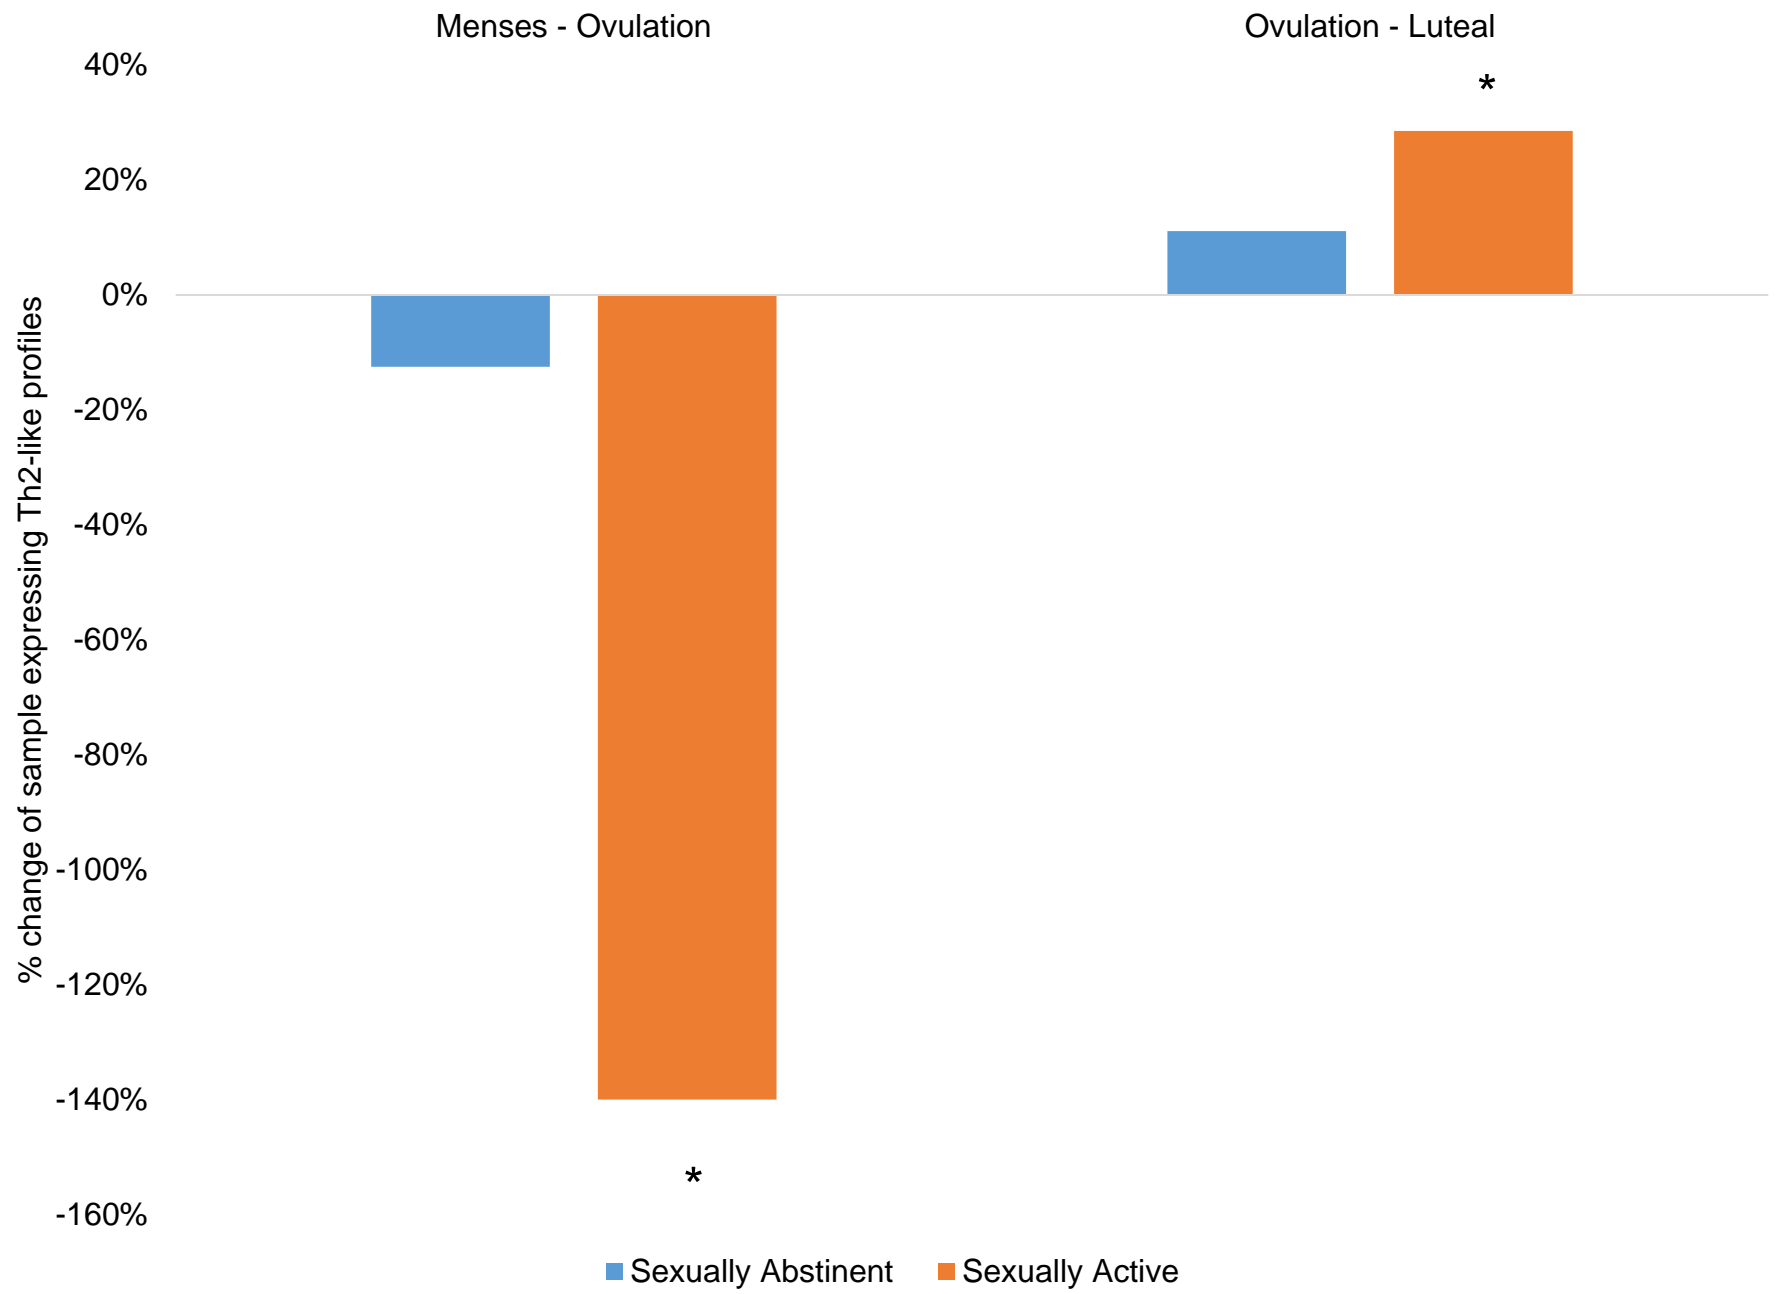

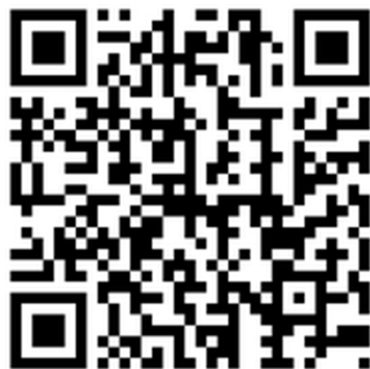

—

- - -

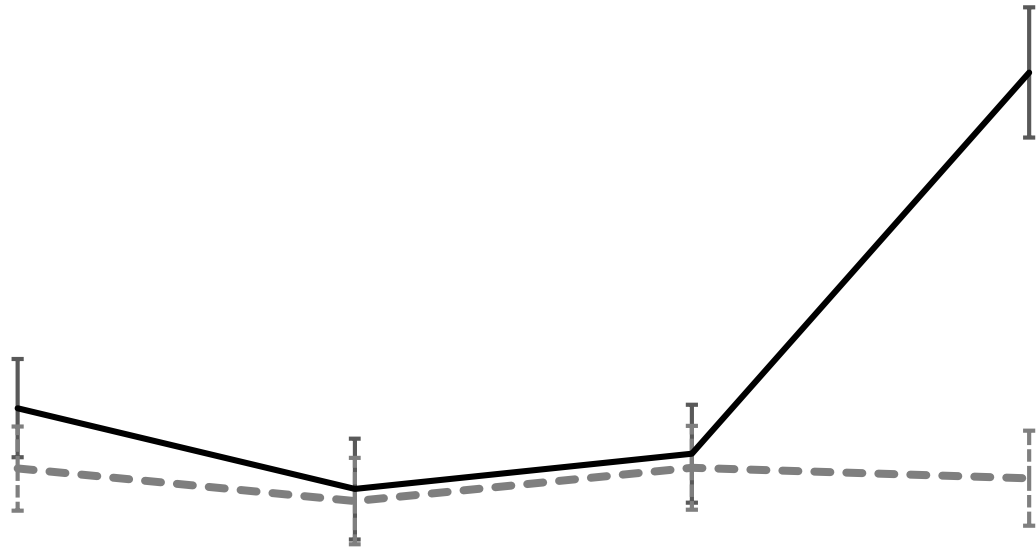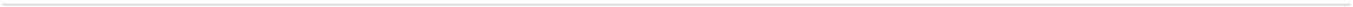

Supplemental Figure 2a. Repeated measures moderated mediation model

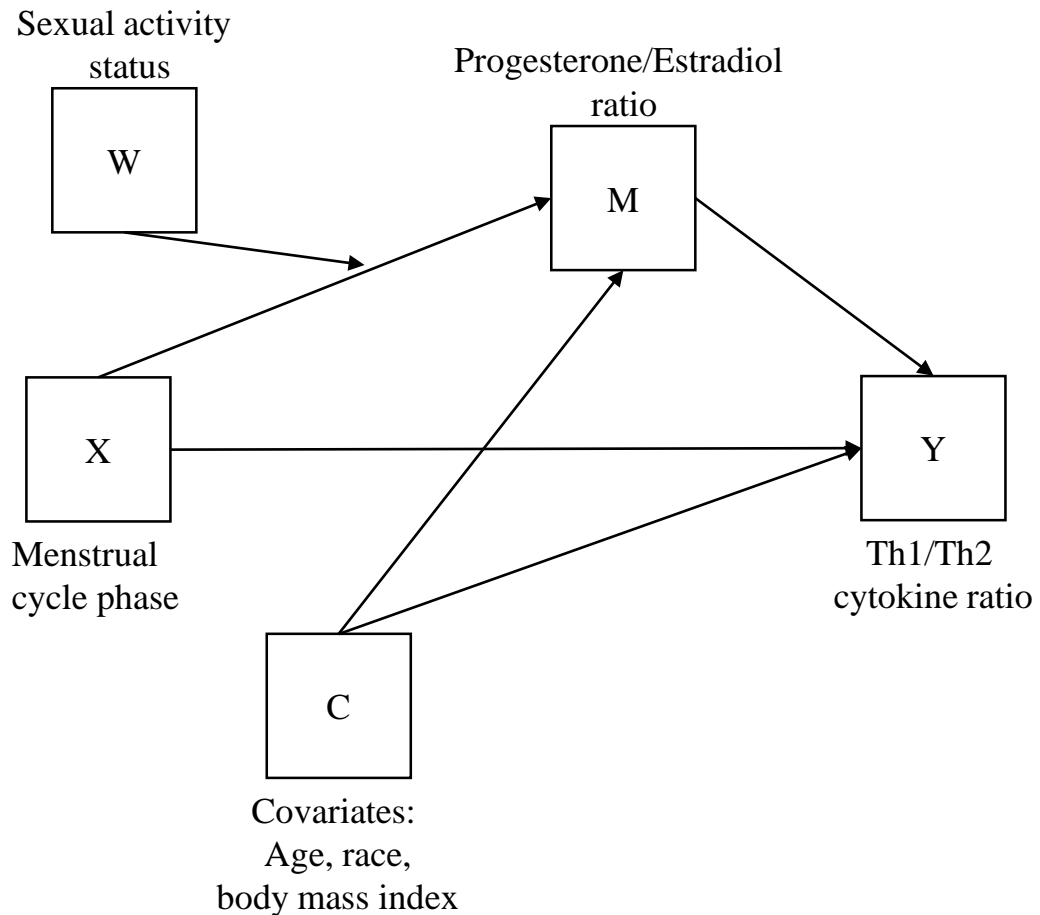

Supplemental Figure 2b. Mediation model (luteal phase only)

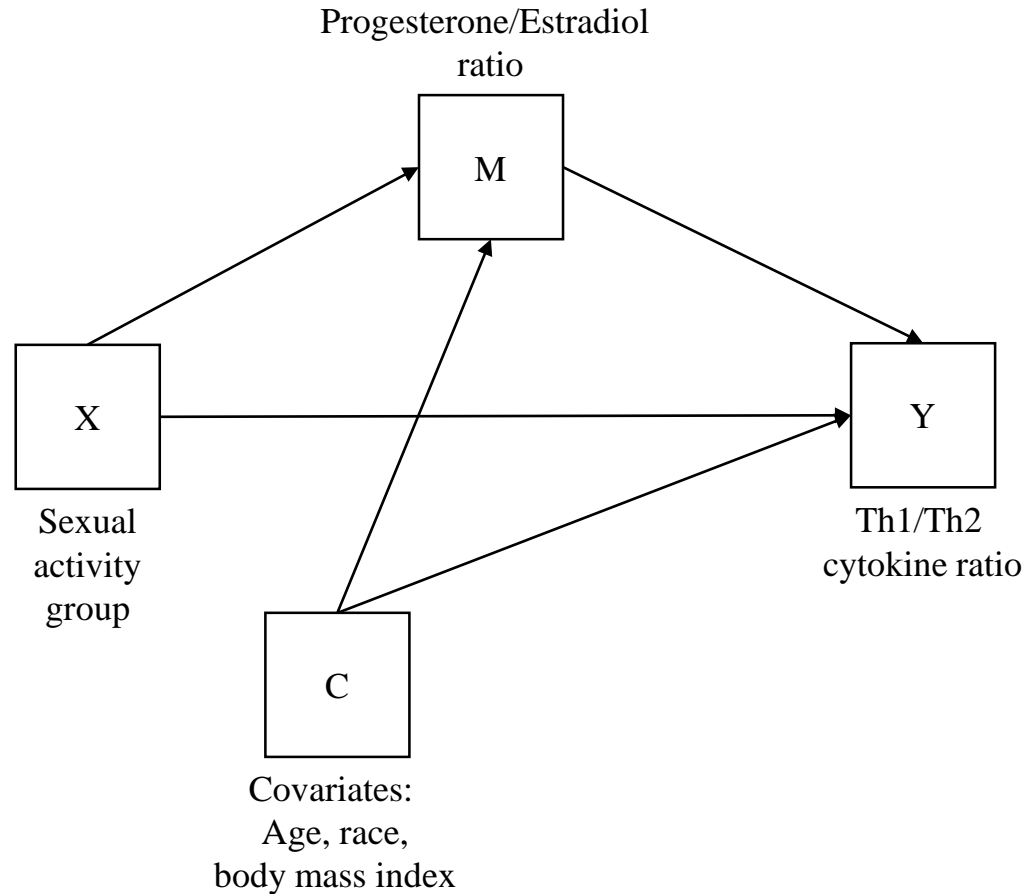

Supplement: NIHMS721149-supplement-supplement_1.pdf [file NIHMS721149-supplement-supplement_1.pdf]
